# Supplementary material for: Effect of different imputation approaches on the evaluation of radiographic progression in patients with psoriatic arthritis: results of the RAPID-PsA 24-week phase III double-blind randomised placebo-controlled study of certolizumab pegol
Source: PubMed Central journal article supplement — Ann Rheum Dis. 2013 Aug 13;73(1):233–7. doi: 10.1136/annrheumdis-2013-203697 (PMC3888591; doi:10.1136/annrheumdis-2013-203697), 2013-08-13
Supplement: annrheumdis-2013-203697-s1.pdf [file annrheumdis-2013-203697-s1.pdf]

## SUPPLEMENTAL INFORMATION

**Table S1: Baseline demographics**

|                                         | Placebo<br>(n=136)        | CZP<br>200 mg Q2W<br>(n=138) | CZP<br>400 mg Q4W<br>(n=135) |
|-----------------------------------------|---------------------------|------------------------------|------------------------------|
| <b>Demographic characteristics</b>      |                           |                              |                              |
| Age, years                              | 47.3 ± 11.1               | 48.2 (12.3)                  | 47.1 (10.8)                  |
| Sex, % female                           | 58.1                      | 53.6                         | 54.1                         |
| Race, % white                           | 97.1                      | 97.8                         | 98.5                         |
| Weight, kg                              | 82.6 ± 19.9 <sup>††</sup> | 85.8 ± 17.7                  | 84.8 ± 18.7                  |
| BMI, kg/m <sup>2</sup>                  | 29.2 ± 6.7 <sup>††</sup>  | 30.5 ± 6.2                   | 29.6 ± 6.6                   |
| <b>Arthritis characteristics</b>        |                           |                              |                              |
| Psoriatic arthritis duration, years     | 18.0 ± 12.3               | 17.3 ± 12.3                  | 16.8 ± 13.4                  |
| CRP** (mg/L), median (min-max)          | 9.0 (0.2 – 131.0)         | 7.0 (0.2 – 238.0)            | 8.7 (0.1 – 87.0)             |
| ESR (mm/h), median (min-max)            | 34.0 (6.0 – 125.0)        | 35.0 (5.0 – 125.0)           | 33.0 (4.0 – 120.0)           |
| Tender joint count (0-68 joints)        | 19.9 ± 14.7               | 21.5 ± 15.3                  | 19.6 ± 14.8                  |
| Swollen joint count (0-66 joints)       | 10.4 ± 7.6                | 11.0 ± 8.8                   | 10.5 ± 7.5                   |
| HAQ-DI (range 0-3)                      | 1.3 ± 0.7                 | 1.3 ± 0.7                    | 1.3 ± 0.6                    |
| Modified total Sharp score              | 24.4 ± 46.5               | 18.0 ± 30.6                  | 22.8 ± 46.5                  |
| Erosion score                           | 14.0 ± 27.0               | 10.3 ± 17.3                  | 13.4 ± 25.2                  |
| Joint space narrowing score             | 10.4 ± 23.3               | 7.7 ± 14.5                   | 9.4 ± 22.1                   |
| <b>Prior use of synthetic DMARDs, %</b> |                           |                              |                              |
| 1                                       | 54.4                      | 44.2                         | 53.3                         |
| ≥ 2                                     | 44.1                      | 52.9                         | 44.4                         |
| <b>Prior use of NSAIDs, %</b>           |                           |                              |                              |
|                                         | 83.8                      | 81.9                         | 91.1                         |
| <b>Prior TNF inhibitor exposure, %</b>  |                           |                              |                              |
|                                         | 19.1                      | 22.5                         | 17.0                         |
| <b>Concomitant MTX at baseline, %</b>   |                           |                              |                              |
|                                         | 61.8                      | 63.8                         | 65.2                         |

\* Except where indicated otherwise, values are the mean ± SD. There were no significant differences between treatment groups at baseline. BMI: Body mass index; CRP: C-reactive protein; CZP: Certolizumab pegol; DI: Disability index; DMARDs: Disease-modifying antirheumatic drugs; ESR: Erythrocyte sedimentation rate HAQ: Health Assessment Questionnaire; NSAIDs: Nonsteroidal antiinflammatory drugs; MTX: Methotrexate; Q2W: Every 2 weeks; Q4W: Every 4 weeks; TNF: Tumor necrosis factor

\*\* Normal range of CRP < 8.0 mg/L

†† n=135

**Table S2: Change from baseline in mTSS and mTSS nonprogressor rates by baseline risk factors**

| Baseline risk factor | Treatment      | Mean mTSS change from baseline | mTSS nonprogressor rate (%) |
|----------------------|----------------|--------------------------------|-----------------------------|
| CRP ≤15 mg/L         | Placebo (n=90) | 0.12                           | 92.2                        |
|                      | CZP (n=194)    | 0.03                           | 96.9                        |
| CRP >15 mg/L         | Placebo (n=46) | 0.51                           | 78.3                        |
|                      | CZP (n=79)     | 0.08*                          | 96.2*                       |
| mTSS ≤ median (6)    | Placebo (n=78) | 0.06                           | 97.4                        |
|                      | CZP (n=130)    | 0.04                           | 98.4                        |
| mTSS > median (6)    | Placebo (n=58) | 0.54                           | 74.1                        |
|                      | CZP (n=143)    | 0.08*                          | 95.1*                       |

\* p<0.05; CRP: C-reactive protein; CZP: Certolizumab pegol; mTSS: modified total Sharp score. mTSS nonprogressor defined as mean mTSS change from baseline ≤0.5. Median mTSS change from baseline imputation was used in patients with <2 analyzable mTSS scores.

**Figure S1: Patient disposition and availability of radiographs**

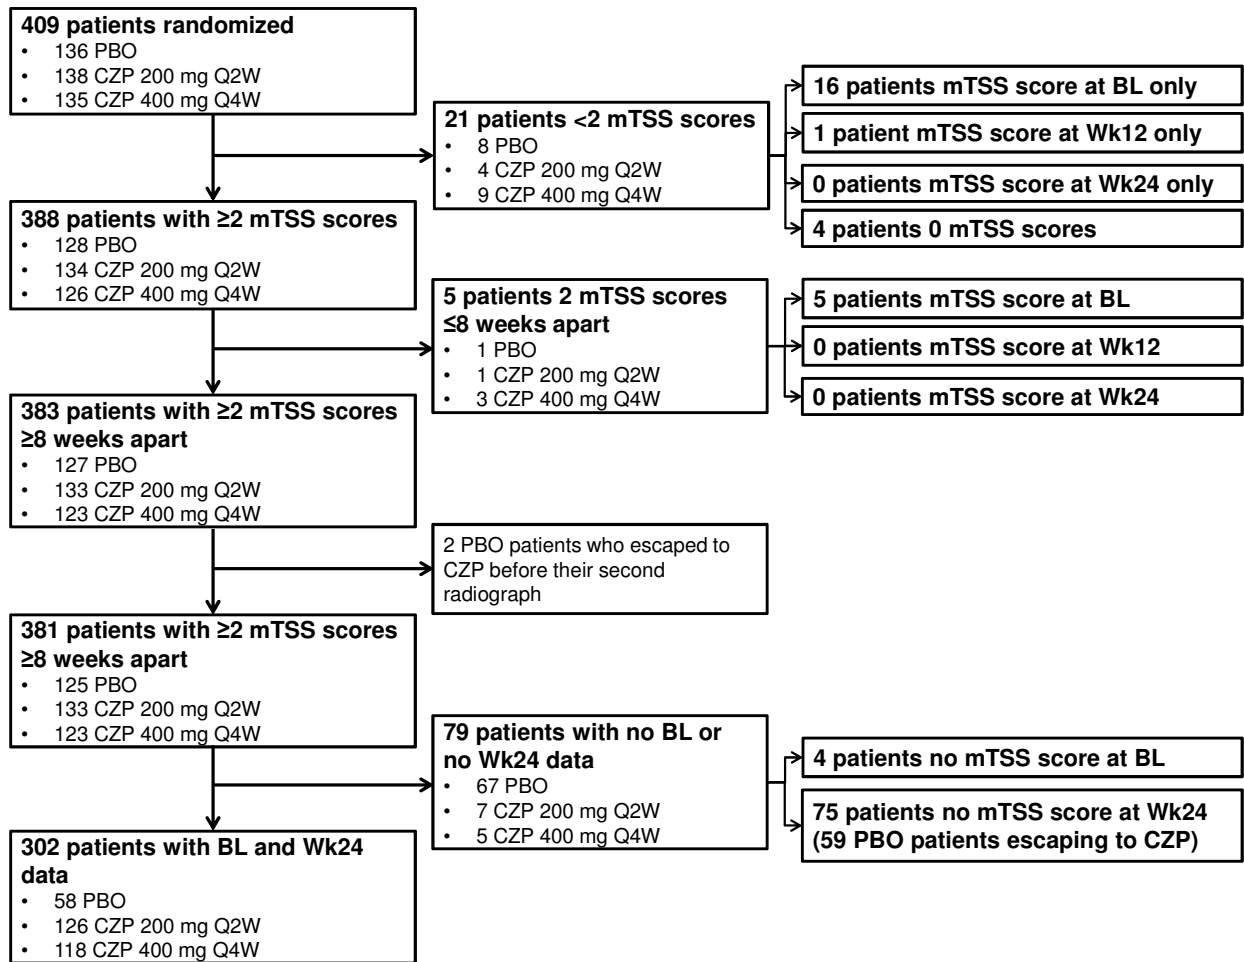

BL: Baseline; CZP: Certolizumab pegol; LD: Loading dose; mTSS: modified total Sharp score; PBO: Placebo; Q2W: Every 2 weeks; Q4W: Every 4 weeks; Wk: Week.
